# Supplementary material
Source: MDPI journal article supplement (https://www.mdpi.com/2073-4395/11/5/852)
Supplement: s1 [file s1 › agronomy-1187802-supplementary.pdf]

**Table S1.** Information on country, management practices studied, microbial analysis, duration, and sampling depth for each study included in the review.

| Country       | Study Type             | Tillage or Residue Management Type*                   | Fertilizer Type*     | Non-Wheat Crops* | Microbial Analysis Types                                                                                | Duration (yrs) | Sampling Depth (cm)                          | Citation |
|---------------|------------------------|-------------------------------------------------------|----------------------|------------------|---------------------------------------------------------------------------------------------------------|----------------|----------------------------------------------|----------|
| China         | tillage                | reduced tillage**                                     |                      |                  | microbial biomass***                                                                                    | 8              | 0-5, 5-10, 10-20, 20-30                      | 24       |
| Australia     | tillage                | residue management                                    |                      |                  | microbial biomass                                                                                       | 9              | 0-10, 20-20                                  | 25       |
| Iran          | tillage                | reduced tillage                                       |                      |                  | bacteria counting, microbial biomass                                                                    | 2              | 0-10, 10-20, 20-30                           | 26       |
| United States | tillage, cropping      | reduced tillage                                       |                      | barley, pea      | microbial biomass                                                                                       | 21             | 0-5, 5-20                                    | 27       |
| China         | tillage                | reduced tillage                                       |                      |                  | microbial biomass                                                                                       | 17             | 0-5, 5-10, 10-20, 20-30, 30-40, 40-50, 50-60 | 28       |
| China         | tillage                | reduced tillage                                       |                      |                  | enzyme analysis, microbial biomass                                                                      | 14             | 0-5, 5-10, 10-20, 20-30                      | 29       |
| China         | tillage                | reduced tillage, straw management                     |                      |                  | microbial biomass                                                                                       | 2              | 0-10, 10-20                                  | 30       |
| China         | tillage                | reduced tillage                                       |                      |                  | microbial biomass                                                                                       | 16             | 0-5, 5-10, 10-20, 20-30                      | 31       |
| China         | tillage                | reduced tillage, straw management                     |                      |                  | microbial biomass                                                                                       | 22             | 0-5, 5-10, 10-20, 20-30, 30-40, 40-50, 50-60 | 32       |
| Ethiopia      | tillage                | reduced tillage                                       |                      |                  | microbial biomass                                                                                       | 6              | 0-15, 15-30                                  | 33       |
| China         | tillage                | plastic film mulch, reduced tillage, straw management |                      |                  | cultures, enzyme analysis                                                                               | 6              | 0-30                                         | 34       |
| China         | tillage                | reduced tillage, straw management                     |                      |                  | microbial biomass                                                                                       | 14             | 0-5, 5-10, 10-30                             | 35       |
| United States | tillage                | reduced tillage                                       |                      |                  | bacterial gene sequences                                                                                | 10             | 0-10                                         | 36       |
| China         | tillage                | reduced tillage                                       |                      |                  | bacterial gene sequences                                                                                | 6              | 0-20, 20-40, 40-60                           | 37       |
| Australia     | tillage, fertilization | reduced tillage                                       | inorganic fertilizer |                  | EcoPlate, enzyme analysis, microbial biomass, terminal restruction fragment length polymorphism (TRFLP) | varied         | 0-15                                         | 38       |
| China         | tillage, fertilization | soybean residue management                            | inorganic fertilizer |                  | enzyme analysis                                                                                         | 6              | 0-20, 20-40                                  | 41       |
| Australia     | tillage                | straw burning                                         |                      |                  | microbial biomass                                                                                       | 17             | 0-5                                          | 42       |

|               |                        |                                      |                                 |                                                                              |                                                                                    |        |                         |    |
|---------------|------------------------|--------------------------------------|---------------------------------|------------------------------------------------------------------------------|------------------------------------------------------------------------------------|--------|-------------------------|----|
| Canada        | tillage, fertilization | straw management                     | Inorganic fertilizer            |                                                                              | EcoPlate, enzyme analysis, microbial biomass                                       | 3      | 0-7.5                   | 43 |
| China         | tillage                | straw management                     |                                 |                                                                              | microbial biomass                                                                  | 8      | 0-10, 10-20             | 44 |
| China         | tillage, fertilization | straw management                     | inorganic fertilizer, manure    |                                                                              | enzyme analysis, microbial biomass                                                 | 25     | 0-15                    | 45 |
| China         | tillage                | plastic film mulch, straw management |                                 |                                                                              | bacterial gene sequences                                                           | 5      | 0-20                    | 46 |
| China         | tillage                | plastic film mulch                   |                                 |                                                                              | AMF root colonization, enzyme analysis, fungal gene sequences, glomalin extraction | 0.25   | 0-25                    | 47 |
| United States | tillage                | reduced tillage                      |                                 |                                                                              | fungal gene sequences                                                              | 9      | 10, 25, 50, 75, 100     | 50 |
| United States | tillage, fertilization | reduced tillage                      | biosolids, inorganic fertilizer |                                                                              | fungal gene sequences                                                              | 5      | 0-3                     | 51 |
| United States | tillage, fertilization | reduced tillage                      | biosolids, inorganic fertilizer |                                                                              | bacterial gene sequences                                                           | 5      | 0-3                     | 52 |
| United States | tillage, cropping      | reduced tillage                      |                                 | lentil                                                                       | ELISA fungi test, glomalin extraction                                              | 12     | 0-5                     | 53 |
| United States | tillage                | reduced tillage                      |                                 |                                                                              | fungal gene sequences                                                              | 13     | 0-20                    | 54 |
| China         | tillage                | reduced tillage                      |                                 |                                                                              | bacterial gene sequences, fungal gene sequences                                    | 17     | 0-5, 5-10, 10-20, 20-30 | 55 |
| United States | cropping               |                                      |                                 | oat, pea, flax, rapeseed, lentil, vetch, clover, barley, safflower, phacelia | enzyme analysis, PLFA                                                              | 1      | 0-5, 5-15               | 59 |
| United States | cropping               |                                      |                                 |                                                                              | microbial biomass                                                                  | 9      | 0-30                    | 60 |
| China         | fertilization          |                                      |                                 |                                                                              | microbial biomass                                                                  | 8      | 0-20, 20-40             | 61 |
| United States | cropping               |                                      |                                 | corn, millet                                                                 | microbial biomass                                                                  | 12     | 0-2.5, 2.5-5            | 62 |
| United States | tillage, cropping      | reduced tillage                      |                                 | corn, millet                                                                 | enzyme analysis, microbial biomass, PLFA                                           | 15     | 0-5, 5-15               | 63 |
| United States | tillage, cropping      | reduced tillage                      |                                 | lentil, pea                                                                  | microbial biomass                                                                  | 6      | 0-20                    | 64 |
| United States | cropping               |                                      |                                 |                                                                              | microbial biomass                                                                  | varied | 0-20                    | 65 |
| Australia     | cropping               |                                      |                                 | rye, lupin, canola, field                                                    | microbial biomass                                                                  | 2      | 0-10                    | 66 |

|               |                                  |                 |                               |                                                        |                                                                                   |    |                      |    |
|---------------|----------------------------------|-----------------|-------------------------------|--------------------------------------------------------|-----------------------------------------------------------------------------------|----|----------------------|----|
|               |                                  |                 |                               | pea, vetch,<br>lentils                                 |                                                                                   |    |                      |    |
| United States | cropping                         |                 |                               | pea                                                    | microbial biomass                                                                 | 8  | 0-15                 | 67 |
| United States | fertilization, cropping          |                 | grazing                       | pea, alfalfa, hay                                      | enzyme analysis, microbial biomass                                                | 5  | 0-7.5, 7.5-15, 15-30 | 68 |
| Canada        | cropping                         |                 |                               | pea, lentil, vetch                                     | culturing, enzyme analysis, microbial biomass                                     | 6  | 0-10                 | 69 |
| Canada        | cropping                         |                 |                               | pea, lentil, canola                                    | bacterial gene sequences                                                          | 1  | 0-15                 | 70 |
| Canada        | cropping                         |                 |                               | pea, lentil, chickpea                                  | bacterial gene sequences                                                          | 4  | rhizosphere          | 71 |
| Canada        | cropping                         |                 |                               | chickpea, yellow pea                                   | bacterial gene sequences                                                          | 2  | rhizosphere          | 72 |
| Australia     | tillage, fertilization, cropping | reduced tillage | inorganic phosphorus          | pea, lupin, barley, canola, linseed, oat, tricale, hay | AMF root colonization                                                             | 12 |                      | 73 |
| Australia     | cropping                         |                 |                               | canola, pea, lupin                                     | microbial biomass                                                                 | 3  | 0-10                 | 74 |
| United States | cropping                         |                 |                               | kernza, sorghum, soybean, hay                          | fungal gene sequences                                                             | 13 | 0-10, 10-30          | 76 |
| China         | fertilization                    |                 | inorganic nitrogen            |                                                        | bacterial gene sequences, microbial biomass                                       | 12 | 0-20                 | 79 |
| China         | fertilization                    |                 | inorganic nitrogen            |                                                        | bacterial gene sequences                                                          | 8  | 0-20                 | 80 |
| China         | fertilization                    |                 | inorganic fertilizer, manure  |                                                        | bacterial gene sequences, fungal gene sequences, PLFA                             | 35 | 0-20                 | 82 |
| Canada        | fertilization, cropping          |                 | inorganic fertilizer          |                                                        | microbial biomass, PLFA                                                           | 37 | 0-7.5                | 83 |
| United States | tillage, fertilization           | reduced tillage | grazing, inorganic fertilizer |                                                        | bacterial gene sequences                                                          | 4  | 0-15                 | 86 |
| United States | fertilization                    |                 | inorganic fertilizer, manure  |                                                        | bacterial gene sequences, EcoPlate, enzyme analysis, fungal gene sequences, TRFLP | 6  | 0-15, 15-30          | 87 |
| United States | fertilization, cropping          |                 | compost                       | pea, tricale                                           | enzyme analysis                                                                   | 5  |                      | 88 |
| United States | fertilization                    |                 | compost                       |                                                        | enzyme analysis, microbial biomass                                                | 16 | 0-5, 5-10, 10-30     | 89 |
| Tunisia       | tillage, fertilization           | reduced tillage | compost, inorganic fertilizer |                                                        | culturing, microbial biomass                                                      | 3  | 0-20, 20-40          | 90 |

|               |                         |                                           |           |                                                                  |    |      |    |
|---------------|-------------------------|-------------------------------------------|-----------|------------------------------------------------------------------|----|------|----|
| United States | fertilization           | biosolids, inorganic fertilizer           |           | PLFA                                                             | 18 | 0-10 | 91 |
| China         | fertilization           | inorganic fertilizer, manure, straw mulch |           | AMF spores, fungal gene sequences                                | 29 | 0-15 | 92 |
| China         | cropping, fertilization | inorganic fertilization, manure           | corn, soy | bacterial gene sequences, enzyme analysis, fungal gene sequences | 26 | 0-20 | 96 |

\* Tillage or Residue Management Type is only included for tillage studies. Fertilizer Type is only included for fertilization studies. Non-Wheat Crops is only included for cropping studies.

\*\*Reduced till refers to a reduction in tillage frequency or intensity, including no-till.

\*\*\*Microbial biomass was measured by chloroform-fumigation or substrate-induced respiration.
